# Supplementary material for: Systemic gene therapy for methylmalonic acidemia using the novel adeno-associated viral vector 44.9
Source: PubMed Central journal article supplement — Mol Ther Methods Clin Dev. 2022 Sep 6;27:61–72. doi: 10.1016/j.omtm.2022.09.001 (PMC9490190; doi:10.1016/j.omtm.2022.09.001), 2022-09-06
Supplement: mmc1.pdf [file mmc1.pdf]

**OMTM, Volume 27**

**Supplemental information**

**Systemic gene therapy for methylmalonic acidemia  
using the novel adeno-associated viral vector 44.9**

**Randy J. Chandler, Giovanni Di Pasquale, Jennifer L. Sloan, Samantha McCoy, Brandon T. Hubbard, Tina M. Kilts, Iriani Manoli, John A. Chiorini, and Charles P. Venditti**

**A**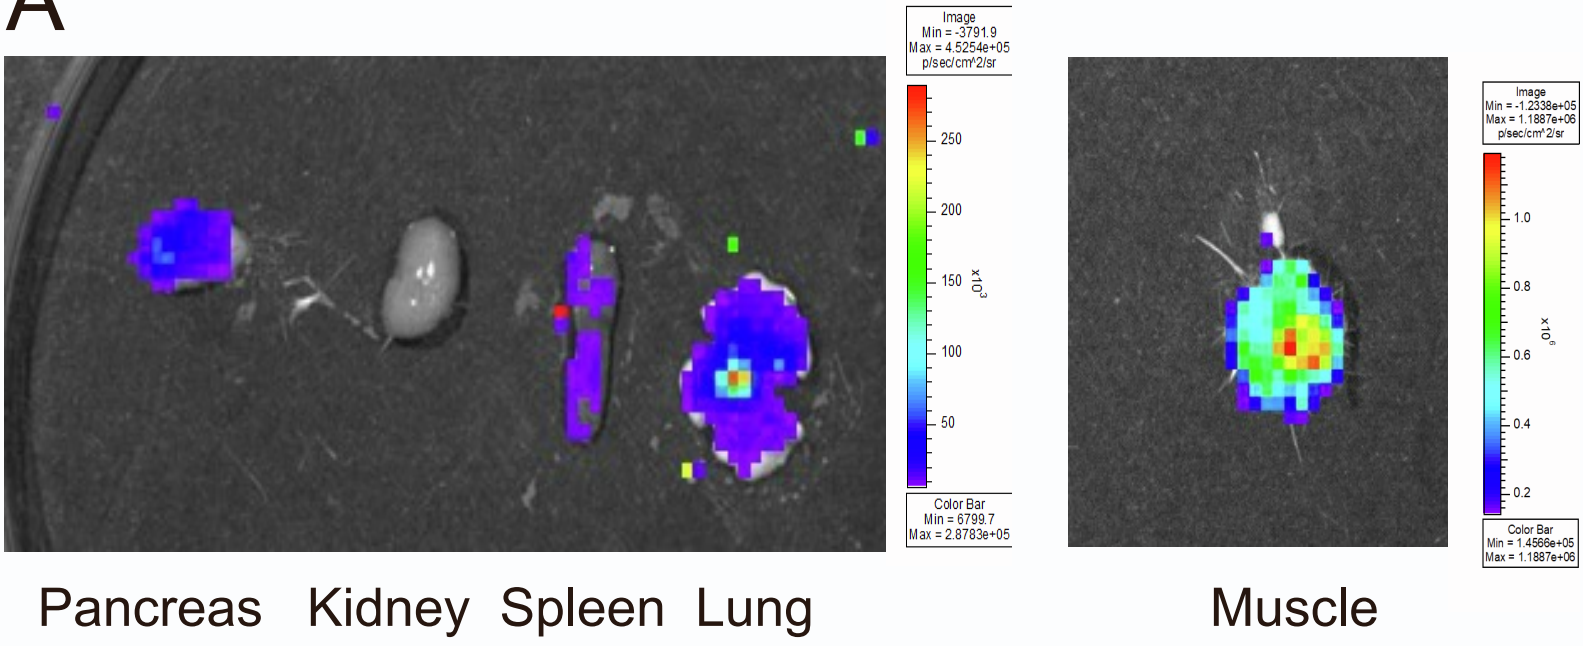**B**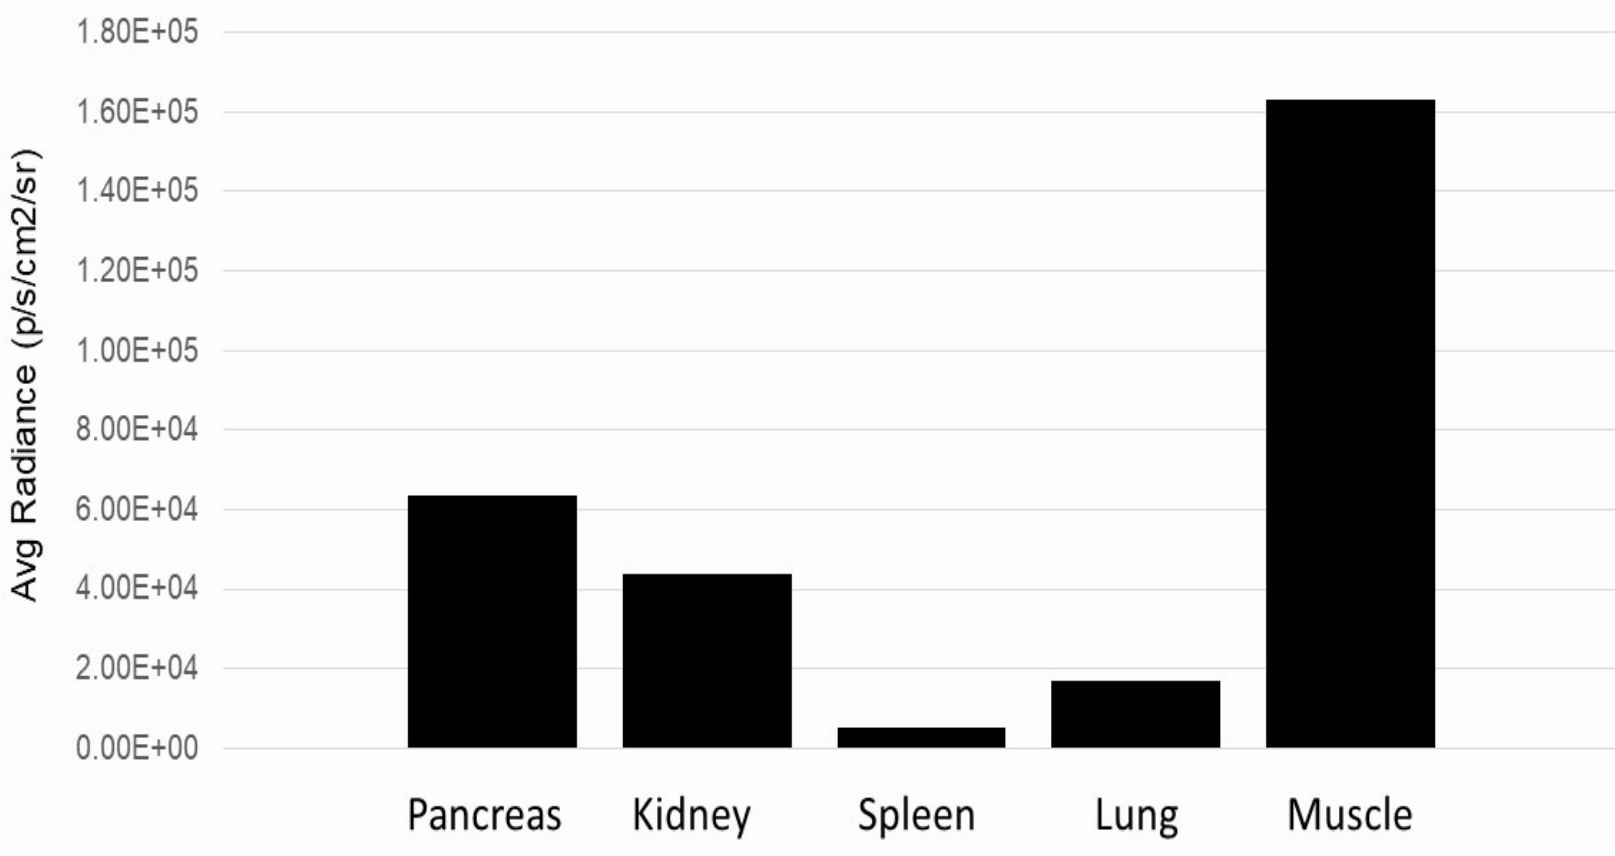

**Figure S1. Transgene expression after AAV44.9 systemic delivery. A.** Luciferase expression in murine organs after treatment with  $1 \times 10^{12}$  vg/mouse of AAV44.9-CMV-luciferase by tail vein injection. **B.** Quantification of luciferase expression in different tissue types.
